# Supplementary material
Source: Springer Nature journal article supplement (https://www.springermedizin.de/resource/supplementary/12882_2005_52_MOESM2_ESM.pdf/9454852)

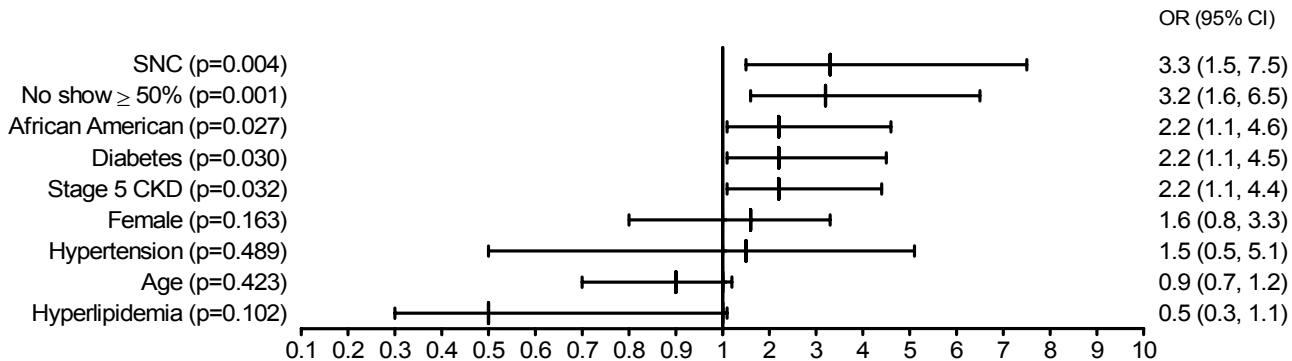

Supplement: MOESM2 [file 9454852]
